# Supplementary material for: Different Mortality Risks of Long-Term Exposure to Particulate Matter across Different Cancer Sites
Source: MDPI journal article supplement (doi:10.3390/ijerph19063180), 2022-03-08
Supplement: s1 [file s1]

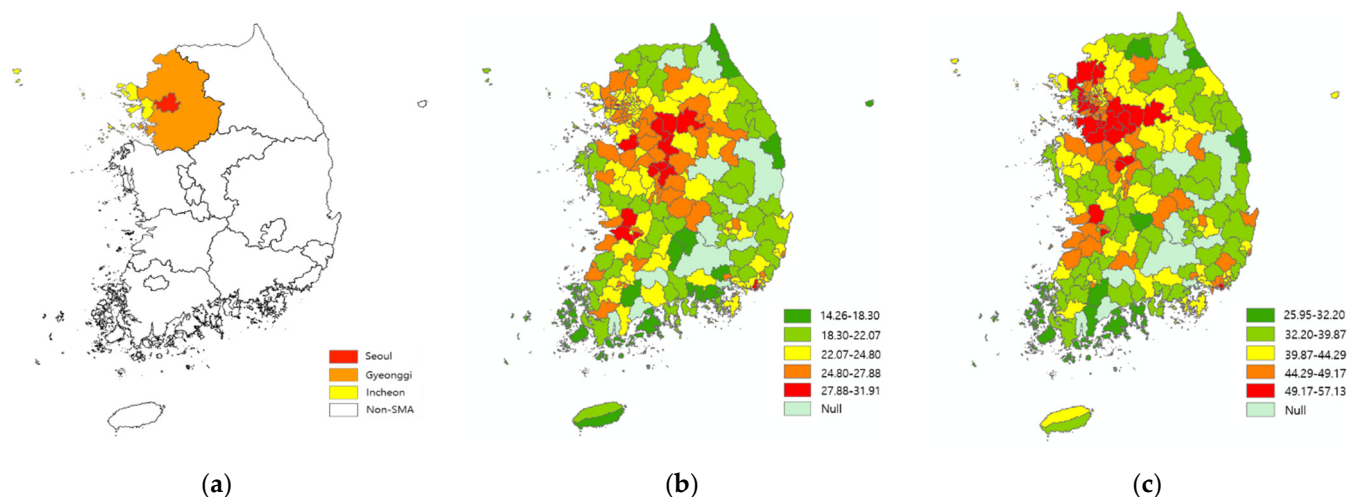

**Figure S1.** Maps of South Korea and the Seoul Metropolitan Area (a), and district-specific concentrations of PM<sub>2.5</sub> (b) and PM<sub>10</sub> (c) for 2015-2019.

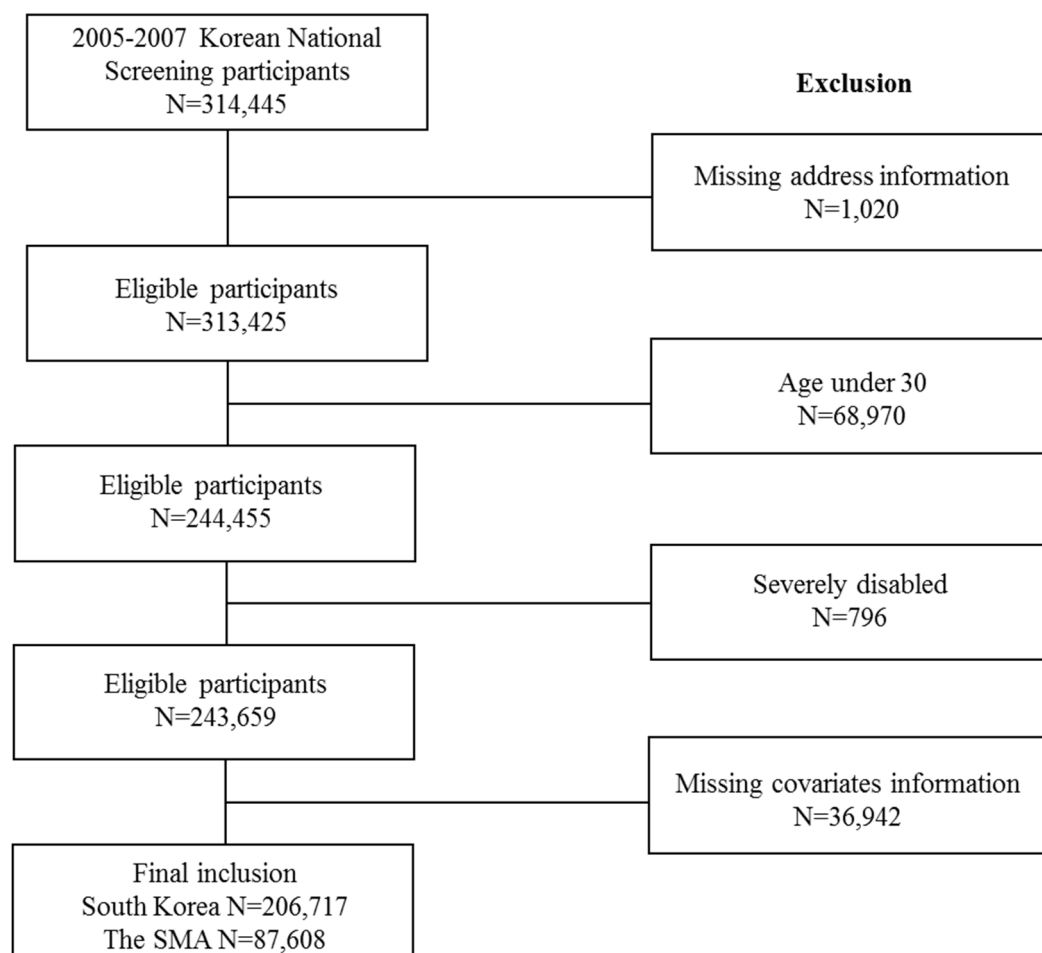

**Figure S2.** Flow chart of our application of subject exclusion criteria to the National Health Insurance Service-National Sample Cohort (NHIS-NSC) subjects.

**Table S1.** Descriptive summary of individual and areal characteristics of 206,717 National Health Insurance Service-National Sample Cohort subjects and by their cancer death status in the South Korea for 2005-2007.

| Characteristic       | Variable                                             | Value          | Total<br>(206,717) | Cancer death <sup>1</sup> |               |
|----------------------|------------------------------------------------------|----------------|--------------------|---------------------------|---------------|
|                      |                                                      |                |                    | No (202,356)              | Yes (4,361)   |
| Demography           | Age                                                  |                | 47.76 (11.46)      | 47.49 (11.33)             | 60.19 (10.70) |
|                      | Sex                                                  | Male           | 52.76              | 52.41                     | 68.68         |
| Socioeconomic status | Health insurance premium                             | 0-40%          | 25.58              | 25.50                     | 29.40         |
|                      |                                                      | 40-60%         | 22.18              | 22.20                     | 20.89         |
|                      |                                                      | 60-80%         | 25.10              | 25.16                     | 22.54         |
|                      |                                                      | 80-100%        | 27.14              | 27.14                     | 27.17         |
|                      | Employed                                             | Yes            | 35.29              | 36.65                     | 18.55         |
| Behavior             | Cigarette smoking status <sup>2</sup>                | Never smoker   | 68.82              | 69.03                     | 59.07         |
|                      |                                                      | Former smoker  | 9.22               | 9.17                      | 11.69         |
|                      |                                                      | Current smoker | 21.96              | 21.90                     | 29.24         |
|                      | Cigarette smoking amount (pack per day) <sup>2</sup> | Never smoker   | 76.00              | 76.19                     | 67.00         |
|                      |                                                      | <0.5           | 5.20               | 5.10                      | 10.28         |
|                      |                                                      | 0.5-1          | 12.97              | 12.91                     | 16.19         |
|                      |                                                      | 1-2            | 5.44               | 5.43                      | 6.09          |
|                      |                                                      | ≥2             | 0.38               | 0.38                      | 0.44          |
|                      | Cigarette smoking period (year) <sup>2</sup>         | Never smoker   | 70.70              | 70.89                     | 61.50         |
|                      |                                                      | <5             | 1.54               | 1.55                      | 1.15          |
|                      |                                                      | 5-9            | 2.57               | 2.60                      | 1.24          |
|                      |                                                      | 10-19          | 10.22              | 10.45                     | 4.63          |
|                      |                                                      | 20-29          | 8.01               | 8.04                      | 6.69          |
|                      |                                                      | ≥30            | 6.85               | 6.47                      | 24.79         |

|                |                       |                  |       |       |       |
|----------------|-----------------------|------------------|-------|-------|-------|
| Area-level     | Alcohol consumption   | Never or rarely  | 57.54 | 57.47 | 60.74 |
|                |                       | 2-3 per month    | 15.54 | 15.67 | 9.52  |
|                |                       | 1-2 per week     | 16.90 | 16.99 | 12.80 |
|                |                       | 3-4 per week     | 6.53  | 6.49  | 8.28  |
|                |                       | Almost everyday  | 3.49  | 3.37  | 8.67  |
|                | Physical activity     | None             | 53.54 | 53.36 | 62.05 |
|                |                       | 1-2 per week     | 25.87 | 26.04 | 17.82 |
|                |                       | 3-4 per week     | 11.20 | 11.27 | 7.68  |
|                |                       | 5-6 per week     | 2.83  | 2.84  | 2.38  |
|                |                       | Almost everyday  | 6.56  | 6.49  | 10.07 |
|                | Nutrition             | Plant-based diet | 22.05 | 22.02 | 23.09 |
|                |                       | Balanced diet    | 74.38 | 74.38 | 74.45 |
|                |                       | Meat-based diet  | 3.57  | 3.59  | 2.46  |
|                | BMI <sup>3</sup>      | <18.5            | 2.46  | 2.41  | 5.09  |
|                |                       | 18.5-25          | 62.94 | 62.9  | 64.6  |
|                |                       | 25-30            | 31.52 | 31.6  | 27.65 |
|                |                       | ≥30              | 3.08  | 3.09  | 2.66  |
| Family history | Cancer                | Yes              | 13.72 | 13.79 | 10.69 |
| Area-level     | Elderly population    | 0-25%            | 22.59 | 25.46 | 18.64 |
|                |                       | 25-50%           | 22.89 | 26.73 | 21.67 |
|                |                       | 50-75%           | 26.48 | 23.32 | 23.60 |
|                |                       | 75-100%          | 25.03 | 24.5  | 36.09 |
|                | High school graduates | 0-25%            | 25.1  | 24.89 | 36.12 |
|                |                       | 25-50%           | 27.08 | 26.01 | 23.55 |
|                |                       | 50-75%           | 22.07 | 24.46 | 20.34 |

|                                     |          |              |              |              |
|-------------------------------------|----------|--------------|--------------|--------------|
|                                     | 75-100%  | 22.75        | 24.64        | 20.00        |
|                                     | 0-25%    | 25.5         | 24.24        | 34.01        |
| Gross Regional Domestic Product     | 25-50%   | 24.71        | 25.42        | 23.82        |
|                                     | 50-75%   | 20.15        | 19.52        | 16.79        |
|                                     | 75-100%  | 29.64        | 30.81        | 25.38        |
|                                     | 0-25%    | 25.63        | 24.75        | 35.77        |
| Population density                  | 25-50%   | 24.85        | 24.46        | 22.68        |
|                                     | 50-75%   | 24.42        | 24.89        | 20.66        |
|                                     | 75-100%  | 25.06        | 25.89        | 20.89        |
|                                     | Urban    | 60.03        | 60.23        | 50.40        |
| Area type                           | Suburban | 24.67        | 24.64        | 26.07        |
|                                     | Rural    | 15.30        | 15.12        | 23.53        |
| Health screening participation rate |          | 61.60 (4.27) | 61.61 (4.27) | 61.37 (4.22) |

<sup>1</sup>All numbers are presented as percent except for age and health screening participation rate presented as mean(standard deviation).

<sup>2</sup>Questionnaire did not include the type of cigarette

<sup>3</sup>BMI, Body Mass Index

**Table S2.** Numbers of deaths for 17 cancer types and descriptive summary of individual characteristics in 206,717 National Health Insurance Service-National Sample Cohort subjects in South Korea for 2007-2015.

| Cancer types <sup>1</sup>   | ICD10        | Case  | %      | Age (mean(sd)) | Sex (Male %) | Premium (Low <sup>2</sup> %) | Premium (High <sup>3</sup> %) | Ever smoker (%) |
|-----------------------------|--------------|-------|--------|----------------|--------------|------------------------------|-------------------------------|-----------------|
| All cancer                  |              | 4,361 | 100.00 | 60.26 (10.69)  | 68.68        | 29.40                        | 27.17                         | 40.93           |
| Total                       |              | 4,122 | 94.52  | 60.19 (10.70)  | 69.07        | 29.28                        | 26.86                         | 41.36           |
| Lung                        | C34          | 1,082 | 24.81  | 61.97(9.29)    | 78.56        | 32.90                        | 25.14                         | 56.10           |
| Liver                       | C22          | 651   | 14.93  | 56.92 (10.73)  | 77.42        | 26.27                        | 25.65                         | 44.09           |
| Stomach                     | C16          | 545   | 12.50  | 60.68 (11.67)  | 69.54        | 30.83                        | 27.71                         | 36.15           |
| Colorectal                  | C18–C21      | 404   | 9.26   | 61.10 (10.45)  | 61.63        | 31.44                        | 26.98                         | 36.39           |
| Pancreas                    | C25          | 349   | 8.00   | 60.88 (9.92)   | 60.74        | 27.22                        | 31.52                         | 33.81           |
| Gallbladder                 | C23–C24      | 228   | 5.23   | 61.66 (9.48)   | 58.33        | 21.93                        | 34.65                         | 28.95           |
| Female genital <sup>4</sup> | C53–C56      | 110   | 2.52   | 55.90 (12.43)  | 0.00         | 32.73                        | 28.18                         | 2.73            |
| Kidney                      | C64–C66, C68 | 84    | 1.93   | 60.60 (10.54)  | 76.19        | 34.52                        | 23.81                         | 36.90           |
| Breast <sup>4</sup>         | C50          | 75    | 1.72   | 48.56 (10.56)  | 0.00         | 25.33                        | 21.33                         | 4.00            |
| Prostate <sup>5</sup>       | C61          | 97    | 2.22   | 65.99 (8.52)   | 100.00       | 26.80                        | 28.87                         | 45.36           |
| Non-Hodgkin's               | C82–C85      | 103   | 2.36   | 61.25 (1.63)   | 64.08        | 27.18                        | 20.39                         | 33.01           |
| Esophagus                   | C15          | 98    | 2.25   | 60.61 (8.90)   | 94.90        | 30.61                        | 25.51                         | 66.33           |
| Leukemia                    | C91–C95      | 73    | 1.67   | 55.86 (12.99)  | 63.01        | 21.92                        | 20.55                         | 31.51           |
| Bladder                     | C67          | 56    | 1.28   | 65.16 (9.77)   | 76.79        | 26.79                        | 37.50                         | 39.29           |
| Oral and Pharynx            | C01–C14      | 66    | 1.51   | 57.82 (12.13)  | 84.85        | 21.21                        | 22.73                         | 56.06           |
| Brain                       | C71          | 50    | 1.15   | 56.22 (11.68)  | 44.00        | 26.00                        | 26.00                         | 20.00           |
| Multiple myeloma            | C88, C90     | 51    | 1.17   | 60.27 (10.47)  | 64.71        | 27.45                        | 27.45                         | 21.57           |

<sup>1</sup>The list of cancer types in descending order according to the number of cancer deaths

<sup>2</sup>Lowest 25% of health insurance premium

<sup>3</sup>Highest 25% of health insurance premium

<sup>4</sup>Summaries among women

<sup>5</sup>Summaries among men

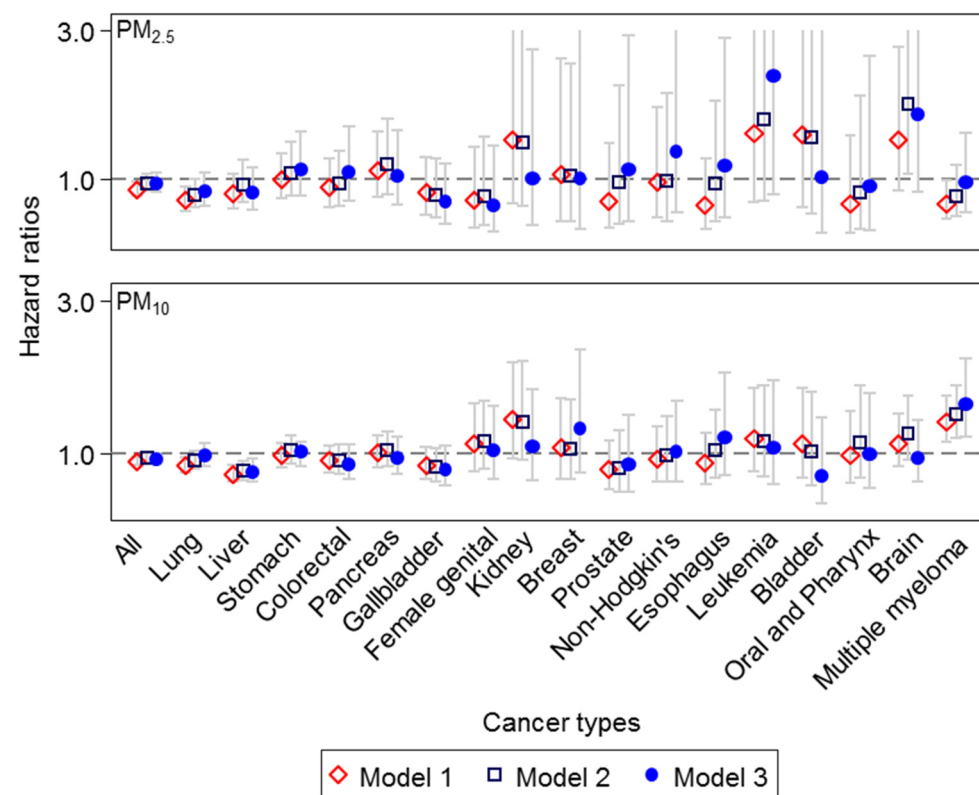

**Figure S3.** Hazard ratios and 95% confidence intervals of cause-specific mortality for an increase of  $10\mu\text{g}/\text{m}^3$  in individual-level PM concentrations for the previous 5 years after adjusting for individual or areal characteristics in 206,717 National Health Insurance Service-National Sample Cohort subjects in South Korea (cancer types seen from the highest number of deaths on the left to the lowest on the right; the maximum y-axis limit set to 3.0, for improving readability without presenting extremely high upper bounds of confidence intervals as seen in Table S5).

**Table S3.** Hazard ratios and 95% confidence intervals of cancer-specific mortality for a 10µg/m<sup>3</sup> increase in individual-level PM<sub>2.5</sub> concentrations for the previous 5 years after adjusting for individual or areal characteristics in 87,608 National Health Insurance Service-National Sample Cohort subjects in the Seoul Metropolitan Area.

| Cancer type    | Exposure period | Model 1 <sup>1</sup> |             |             | Model 2 <sup>2*</sup> |      |       | Model 3 <sup>3</sup> |      |       |
|----------------|-----------------|----------------------|-------------|-------------|-----------------------|------|-------|----------------------|------|-------|
|                |                 | HRs                  | LL          | UL          | HRs                   | LL   | UL    | HRs                  | LL   | UL    |
| All cancer     | 5 year          | 1.21                 | 0.86        | 1.72        | 1.16                  | 0.79 | 1.69  | 1.19                 | 0.80 | 1.75  |
|                | 3year           | 1.29                 | 0.92        | 1.80        | 1.28                  | 0.90 | 1.84  | 1.32                 | 0.91 | 1.93  |
|                | 1 year          | 1.32                 | 0.95        | 1.83        | 1.23                  | 0.87 | 1.75  | 1.26                 | 0.87 | 1.81  |
| Lung           | 5 year          | 1.74                 | 0.88        | 3.47        | 1.55                  | 0.73 | 3.26  | 1.61                 | 0.75 | 3.46  |
|                | 3year           | 1.84                 | 0.95        | 3.58        | 1.62                  | 0.79 | 3.31  | 1.59                 | 0.76 | 3.36  |
|                | 1 year          | <b>2.28</b>          | <b>1.21</b> | <b>4.30</b> | 1.68                  | 0.84 | 3.35  | 1.65                 | 0.81 | 3.37  |
| Liver          | 5 year          | 0.44                 | 0.17        | 1.14        | 0.42                  | 0.16 | 1.15  | 0.47                 | 0.17 | 1.33  |
|                | 3year           | 0.47                 | 0.19        | 1.17        | 0.45                  | 0.17 | 1.18  | 0.50                 | 0.18 | 1.40  |
|                | 1 year          | 0.62                 | 0.25        | 1.50        | 0.62                  | 0.24 | 1.58  | 0.69                 | 0.26 | 1.85  |
| Stomach        | 5 year          | 2.22                 | 0.88        | 5.61        | 1.90                  | 0.70 | 5.17  | 2.53                 | 0.90 | 7.11  |
|                | 3year           | 2.07                 | 0.84        | 5.10        | 1.92                  | 0.73 | 5.06  | 2.46                 | 0.90 | 6.75  |
|                | 1 year          | 1.59                 | 0.66        | 3.82        | 1.43                  | 0.56 | 3.64  | 1.68                 | 0.64 | 4.42  |
| Colorectal     | 5 year          | 0.60                 | 0.20        | 1.80        | 0.64                  | 0.19 | 2.13  | 0.88                 | 0.26 | 3.02  |
|                | 3year           | 0.75                 | 0.26        | 2.17        | 0.89                  | 0.28 | 2.83  | 1.35                 | 0.41 | 4.47  |
|                | 1 year          | 0.74                 | 0.26        | 2.09        | 0.89                  | 0.29 | 2.77  | 1.33                 | 0.41 | 4.26  |
| Pancreas       | 5 year          | 3.16                 | 1.03        | 9.75        | 3.47                  | 1.05 | 11.51 | 2.88                 | 0.80 | 10.30 |
|                | 3year           | 3.34                 | 1.14        | 9.77        | 3.60                  | 1.16 | 11.23 | 3.07                 | 0.89 | 10.63 |
|                | 1 year          | 2.36                 | 0.82        | 6.82        | 2.47                  | 0.81 | 7.59  | 1.98                 | 0.58 | 6.72  |
| Gallbladder    | 5 year          | 0.86                 | 0.18        | 4.14        | 0.89                  | 0.16 | 4.90  | 0.81                 | 0.14 | 4.76  |
|                | 3year           | 1.10                 | 0.24        | 5.02        | 1.23                  | 0.24 | 6.32  | 1.07                 | 0.19 | 6.00  |
|                | 1 year          | 0.92                 | 0.21        | 4.00        | 0.80                  | 0.16 | 3.96  | 0.68                 | 0.13 | 3.54  |
| Female genital | 5 year          | 0.69                 | 0.10        | 4.83        | 0.69                  | 0.10 | 4.66  | 0.56                 | 0.08 | 3.99  |



|                  |        |      |      |       |      |      |        |       |      |        |
|------------------|--------|------|------|-------|------|------|--------|-------|------|--------|
|                  | 3year  | 1.14 | 0.18 | 7.12  | 1.09 | 0.18 | 6.66   | 0.85  | 0.13 | 5.68   |
|                  | 1 year | 1.21 | 0.21 | 7.07  | 1.16 | 0.20 | 6.69   | 0.97  | 0.16 | 6.01   |
| Kidney           | 5 year | 1.53 | 0.17 | 14.21 | 0.94 | 0.09 | 10.07  | 0.47  | 0.04 | 5.88   |
|                  | 3year  | 1.22 | 0.15 | 10.22 | 0.91 | 0.09 | 8.83   | 0.50  | 0.04 | 5.80   |
|                  | 1 year | 0.74 | 0.09 | 5.87  | 0.61 | 0.07 | 5.63   | 0.36  | 0.03 | 3.84   |
| Breast           | 5 year | 0.71 | 0.06 | 7.83  | 0.67 | 0.06 | 7.50   | 1.23  | 0.11 | 14.22  |
|                  | 3year  | 0.88 | 0.09 | 8.32  | 0.84 | 0.09 | 8.05   | 1.54  | 0.16 | 14.63  |
|                  | 1 year | 0.79 | 0.10 | 6.49  | 0.77 | 0.09 | 6.36   | 1.28  | 0.16 | 10.52  |
| Prostate         | 5 year | 1.80 | 0.21 | 15.76 | 1.98 | 0.13 | 29.76  | 6.95  | 0.45 | 106.89 |
|                  | 3year  | 2.70 | 0.36 | 20.49 | 3.57 | 0.27 | 46.84  | 11.79 | 0.95 | 145.49 |
|                  | 1 year | 2.16 | 0.28 | 16.47 | 2.73 | 0.20 | 36.33  | 7.62  | 0.64 | 91.35  |
| Non-Hodgkin's    | 5 year | 0.66 | 0.07 | 6.22  | 1.44 | 0.12 | 17.83  | 1.33  | 0.09 | 19.70  |
|                  | 3year  | 0.46 | 0.05 | 4.08  | 0.79 | 0.07 | 9.17   | 0.69  | 0.05 | 9.98   |
|                  | 1 year | 0.61 | 0.07 | 4.95  | 0.57 | 0.06 | 5.76   | 0.49  | 0.04 | 6.07   |
| Esophagus        | 5 year | 1.81 | 0.20 | 16.65 | 2.43 | 0.21 | 27.82  | 1.70  | 0.10 | 29.60  |
|                  | 3year  | 2.58 | 0.31 | 21.73 | 2.87 | 0.27 | 30.72  | 1.71  | 0.10 | 28.08  |
|                  | 1 year | 2.47 | 0.33 | 18.52 | 3.02 | 0.34 | 27.29  | 1.74  | 0.13 | 24.15  |
| Leukemia         | 5 year | 2.29 | 0.24 | 22.01 | 0.93 | 0.07 | 12.45  | 0.77  | 0.05 | 10.99  |
|                  | 3year  | 1.14 | 0.12 | 11.02 | 0.87 | 0.07 | 10.95  | 0.67  | 0.05 | 9.18   |
|                  | 1 year | 1.87 | 0.20 | 17.41 | 2.42 | 0.22 | 26.90  | 2.14  | 0.18 | 25.88  |
| Bladder          | 5 year | 0.30 | 0.02 | 4.07  | 0.16 | 0.01 | 3.29   | 0.14  | 0.01 | 3.94   |
|                  | 3year  | 0.28 | 0.02 | 3.41  | 0.25 | 0.01 | 4.37   | 0.26  | 0.01 | 6.61   |
|                  | 1 year | 0.27 | 0.02 | 3.17  | 0.30 | 0.02 | 4.54   | 0.33  | 0.02 | 7.27   |
| Oral and Pharynx | 5 year | 2.76 | 0.18 | 41.84 | 7.14 | 0.40 | 126.86 | 6.74  | 0.35 | 131.46 |
|                  | 3year  | 2.13 | 0.16 | 28.19 | 5.31 | 0.36 | 78.93  | 4.40  | 0.27 | 72.45  |

|                  |        |      |      |       |      |      |       |      |      |       |
|------------------|--------|------|------|-------|------|------|-------|------|------|-------|
|                  | 1 year | 4.34 | 0.45 | 42.36 | 8.14 | 0.80 | 83.10 | 6.84 | 0.59 | 78.88 |
| Brain            | 5 year | 1.94 | 0.36 | 10.41 | 1.62 | 0.29 | 8.97  | 1.24 | 0.16 | 9.46  |
|                  | 3year  | 0.72 | 0.13 | 4.07  | 0.72 | 0.12 | 4.21  | 0.70 | 0.10 | 4.88  |
|                  | 1 year | 1.40 | 0.24 | 8.08  | 1.35 | 0.23 | 8.01  | 1.91 | 0.28 | 13.22 |
| Multiple myeloma | 5 year | 0.37 | 0.11 | 1.19  | 0.63 | 0.18 | 2.18  | 0.39 | 0.11 | 1.45  |
|                  | 3year  | 0.41 | 0.13 | 1.32  | 0.64 | 0.18 | 2.24  | 0.38 | 0.10 | 1.36  |
|                  | 1 year | 0.41 | 0.13 | 1.28  | 0.59 | 0.18 | 1.97  | 0.38 | 0.11 | 1.31  |

\*Primary model

<sup>1</sup>Model 1: PM + age + sex

<sup>2</sup>Model 2: Model 1 + Health insurance premium + Employment status+ Cigarette smoking status + Cigarette smoking amount (pack per day) + Cigarette smoking period (year) + Alcohol consumption + Physical activity + Nutrition + BMI + Family history of cancer

<sup>3</sup>Model 3: Model 2 + district-level of Elderly population, completeness of high school graduates, Gross Regional Domestic Product, and Population density + Area type + Health screening participation

Formula of primary model:

$$\lambda(t) = \lambda_0(t_0)\exp\{\beta_1 PM(t_i) + \beta_2 age(t_0) + \beta_3 sex(t_0) + \beta_4 Health\ insurance\ premium(t_0) + \beta_5 Employment\ status(t_0) + \beta_6 Cigarette\ smoking\ status(t_0) + \beta_7 Cigarette\ smoking\ amount\ (pack\ per\ day)(t_0) + \beta_8 Cigarette\ smoking\ period\ (year)(t_0) + \beta_9 Alcohol\ consumption(t_0) + \beta_{10} Physical\ activity(t_0) + \beta_{11} Nutrition(t_0) + \beta_{12} BMI(t_0) + \beta_{13} Family\ history\ of\ cancer(t_0)\}$$

$t_0$  and  $t_i$ : baseline and time  $i$  between 2007-2015

**Table S4.** Hazard ratios and 95% confidence intervals of cancer-specific mortality for a 10µg/m<sup>3</sup> increase in individual-level PM<sub>10</sub> concentrations for the previous 5 years after adjusting for individual or areal characteristics in 87,608 National Health Insurance Service-National Sample Cohort subjects in the Seoul Metropolitan Area.

| Cancer type    | Exposure period | Model 1 <sup>1</sup> |             |             | Model 2 <sup>2*</sup> |             |             | Model 3 <sup>3</sup> |      |      |
|----------------|-----------------|----------------------|-------------|-------------|-----------------------|-------------|-------------|----------------------|------|------|
|                |                 | HRs                  | LL          | UL          | HRs                   | LL          | UL          | HRs                  | LL   | UL   |
| All cancer     | 5 year          | 0.96                 | 0.82        | 1.11        | 0.93                  | 0.79        | 1.09        | 0.88                 | 0.73 | 1.06 |
|                | 3year           | 1.02                 | 0.89        | 1.18        | 1.01                  | 0.86        | 1.17        | 0.98                 | 0.82 | 1.18 |
|                | 1 year          | 1.06                 | 0.93        | 1.22        | 1.03                  | 0.89        | 1.19        | 1.02                 | 0.86 | 1.21 |
| Lung           | 5 year          | 1.29                 | 0.96        | 1.73        | 1.13                  | 0.82        | 1.55        | 1.06                 | 0.74 | 1.53 |
|                | 3year           | 1.29                 | 0.98        | 1.70        | 1.14                  | 0.85        | 1.54        | 1.07                 | 0.76 | 1.52 |
|                | 1 year          | <b>1.36</b>          | <b>1.05</b> | <b>1.77</b> | 1.17                  | 0.88        | 1.55        | 1.11                 | 0.80 | 1.54 |
| Liver          | 5 year          | 0.68                 | 0.45        | 1.02        | 0.61                  | 0.39        | 0.94        | 0.58                 | 0.36 | 0.95 |
|                | 3year           | 0.77                 | 0.52        | 1.13        | 0.70                  | 0.46        | 1.05        | 0.69                 | 0.43 | 1.10 |
|                | 1 year          | <b>0.45</b>          | <b>0.31</b> | <b>0.65</b> | 0.86                  | 0.58        | 1.27        | 0.89                 | 0.57 | 1.39 |
| Stomach        | 5 year          | 0.89                 | 0.58        | 1.34        | 0.91                  | 0.59        | 1.42        | 0.93                 | 0.56 | 1.55 |
|                | 3year           | 0.92                 | 0.62        | 1.35        | 0.96                  | 0.63        | 1.45        | 0.97                 | 0.60 | 1.58 |
|                | 1 year          | 0.88                 | 0.61        | 1.28        | 0.90                  | 0.61        | 1.35        | 0.89                 | 0.57 | 1.40 |
| Colorectal     | 5 year          | 0.65                 | 0.41        | 1.06        | 0.66                  | 0.39        | 1.13        | 0.76                 | 0.42 | 1.38 |
|                | 3year           | 0.77                 | 0.49        | 1.21        | 0.82                  | 0.50        | 1.34        | 1.00                 | 0.57 | 1.76 |
|                | 1 year          | 0.80                 | 0.52        | 1.22        | 0.86                  | 0.54        | 1.39        | 1.05                 | 0.62 | 1.79 |
| Pancreas       | 5 year          | 1.59                 | 0.98        | 2.56        | 1.62                  | 0.97        | 2.69        | 1.42                 | 0.77 | 2.60 |
|                | 3year           | <b>1.61</b>          | <b>1.03</b> | <b>2.52</b> | <b>1.63</b>           | <b>1.01</b> | <b>2.63</b> | 1.49                 | 0.83 | 2.66 |
|                | 1 year          | 1.52                 | 0.98        | 2.35        | 1.53                  | 0.96        | 2.44        | 1.37                 | 0.79 | 2.39 |
| Gallbladder    | 5 year          | 0.54                 | 0.26        | 1.11        | 0.51                  | 0.24        | 1.09        | 0.42                 | 0.19 | 0.93 |
|                | 3year           | 0.68                 | 0.35        | 1.32        | 0.66                  | 0.33        | 1.33        | 0.54                 | 0.25 | 1.17 |
|                | 1 year          | 0.69                 | 0.37        | 1.29        | 0.63                  | 0.32        | 1.23        | 0.53                 | 0.25 | 1.08 |
| Female genital | 5 year          | 1.22                 | 0.54        | 2.77        | 1.16                  | 0.51        | 2.60        | 0.88                 | 0.35 | 2.19 |

|                  |        |             |             |             |      |      |      |      |      |       |
|------------------|--------|-------------|-------------|-------------|------|------|------|------|------|-------|
|                  | 3year  | 1.36        | 0.64        | 2.88        | 1.29 | 0.61 | 2.72 | 1.03 | 0.43 | 2.46  |
|                  | 1 year | 1.32        | 0.63        | 2.75        | 1.26 | 0.61 | 2.61 | 1.04 | 0.46 | 2.39  |
| Kidney           | 5 year | 0.85        | 0.33        | 2.20        | 0.74 | 0.27 | 2.02 | 0.61 | 0.19 | 1.92  |
|                  | 3year  | 0.86        | 0.35        | 2.11        | 0.79 | 0.31 | 2.05 | 0.68 | 0.23 | 2.05  |
|                  | 1 year | 0.90        | 0.38        | 2.12        | 0.81 | 0.33 | 2.02 | 0.74 | 0.26 | 2.09  |
| Breast           | 5 year | 0.99        | 0.38        | 2.63        | 1.00 | 0.37 | 2.66 | 1.58 | 0.54 | 4.62  |
|                  | 3year  | 1.11        | 0.45        | 2.77        | 1.11 | 0.44 | 2.79 | 1.69 | 0.64 | 4.49  |
|                  | 1 year | 1.07        | 0.45        | 2.57        | 1.08 | 0.45 | 2.59 | 1.52 | 0.61 | 3.84  |
| Prostate         | 5 year | <b>0.33</b> | <b>0.12</b> | <b>0.88</b> | 0.37 | 0.11 | 1.25 | 0.72 | 0.16 | 3.11  |
|                  | 3year  | 0.46        | 0.18        | 1.17        | 0.54 | 0.17 | 1.73 | 1.14 | 0.29 | 4.53  |
|                  | 1 year | 0.44        | 0.17        | 1.10        | 0.56 | 0.18 | 1.75 | 1.08 | 0.29 | 4.08  |
| Non-Hodgkin's    | 5 year | 1.09        | 0.42        | 2.79        | 1.35 | 0.48 | 3.85 | 1.30 | 0.36 | 4.67  |
|                  | 3year  | 1.09        | 0.45        | 2.63        | 1.26 | 0.47 | 3.36 | 1.23 | 0.36 | 4.19  |
|                  | 1 year | 1.13        | 0.49        | 2.60        | 1.07 | 0.43 | 2.69 | 0.99 | 0.32 | 3.06  |
| Esophagus        | 5 year | 1.38        | 0.53        | 3.60        | 1.86 | 0.66 | 5.22 | 1.62 | 0.41 | 6.44  |
|                  | 3year  | 1.58        | 0.65        | 3.81        | 1.92 | 0.73 | 4.99 | 1.71 | 0.46 | 6.26  |
|                  | 1 year | 1.59        | 0.69        | 3.62        | 1.95 | 0.80 | 4.74 | 1.77 | 0.54 | 5.80  |
| Leukemia         | 5 year | 1.07        | 0.38        | 2.99        | 0.90 | 0.28 | 2.87 | 0.69 | 0.19 | 2.50  |
|                  | 3year  | 0.84        | 0.31        | 2.24        | 0.91 | 0.31 | 2.69 | 0.69 | 0.20 | 2.34  |
|                  | 1 year | 0.89        | 0.35        | 2.28        | 1.12 | 0.40 | 3.12 | 0.95 | 0.30 | 2.98  |
| Bladder          | 5 year | 0.46        | 0.15        | 1.40        | 0.30 | 0.09 | 1.04 | 0.38 | 0.09 | 1.57  |
|                  | 3year  | 0.52        | 0.18        | 1.47        | 0.42 | 0.13 | 1.36 | 0.56 | 0.14 | 2.32  |
|                  | 1 year | 0.52        | 0.19        | 1.46        | 0.44 | 0.14 | 1.39 | 0.59 | 0.15 | 2.34  |
| Oral and Pharynx | 5 year | 2.10        | 0.70        | 6.32        | 3.02 | 0.93 | 9.84 | 2.73 | 0.67 | 11.18 |
|                  | 3year  | 1.89        | 0.67        | 5.33        | 2.50 | 0.83 | 7.54 | 2.15 | 0.59 | 7.87  |

|                  |        |      |      |      |             |             |             |      |      |      |
|------------------|--------|------|------|------|-------------|-------------|-------------|------|------|------|
|                  | 1 year | 1.09 | 0.43 | 2.78 | <b>2.88</b> | <b>1.08</b> | <b>7.67</b> | 2.68 | 0.85 | 8.40 |
| Brain            | 5 year | 1.06 | 0.40 | 2.82 | 1.02        | 0.37        | 2.79        | 0.84 | 0.27 | 2.61 |
|                  | 3year  | 0.78 | 0.34 | 1.76 | 0.82        | 0.36        | 1.91        | 0.83 | 0.31 | 2.23 |
|                  | 1 year | 1.06 | 0.52 | 2.15 | 1.09        | 0.53        | 2.26        | 1.32 | 0.56 | 3.10 |
| Multiple myeloma | 5 year | 1.09 | 0.63 | 1.90 | 0.98        | 0.54        | 1.77        | 0.73 | 0.38 | 1.40 |
|                  | 3year  | 1.17 | 0.71 | 1.92 | 1.05        | 0.61        | 1.79        | 0.80 | 0.43 | 1.47 |
|                  | 1 year | 1.15 | 0.73 | 1.83 | 1.04        | 0.64        | 1.70        | 0.85 | 0.49 | 1.48 |

\*Primary model

<sup>1</sup>Model 1: PM + age + sex

<sup>2</sup>Model 2: Model 1 + Health insurance premium + Employment status+ Cigarette smoking status + Cigarette smoking amount (pack per day) + Cigarette smoking period (year) + Alcohol consumption + Physical activity + Nutrition + BMI + Family history of cancer

<sup>3</sup>Model 3: Model 2 + district-level of Elderly population, completeness of high school graduates, Gross Regional Domestic Product, and Population density + Area type + Health screening participation

**Table S5.** Hazard ratios and 95% confidence intervals of cause-specific mortality for an increase of 10 $\mu\text{g}/\text{m}^3$  in individual-level PM<sub>2.5</sub> concentrations for the previous 5 years after adjusting for individual or areal characteristics in 206,717 National Health Insurance Service-National Sample Cohort subjects in the South Korea.

| Cancer type    | Exposure period | Model 1 <sup>1</sup> |             |             | Model 2 <sup>2</sup> |             |             | Model 3 <sup>3*</sup> |      |      |
|----------------|-----------------|----------------------|-------------|-------------|----------------------|-------------|-------------|-----------------------|------|------|
|                |                 | HRs                  | LL          | UL          | HRs                  | LL          | UL          | HRs                   | LL   | UL   |
| All cancer     | 5 year          | <b>0.86</b>          | <b>0.76</b> | <b>0.96</b> | 0.94                 | 0.83        | 1.06        | 0.94                  | 0.82 | 1.08 |
|                | 3year           | <b>0.87</b>          | <b>0.78</b> | <b>0.98</b> | 0.96                 | 0.85        | 1.09        | 0.97                  | 0.84 | 1.11 |
|                | 1 year          | <b>0.88</b>          | <b>0.78</b> | <b>0.99</b> | 0.94                 | 0.83        | 1.07        | 0.95                  | 0.83 | 1.09 |
| Lung           | 5 year          | <b>0.71</b>          | <b>0.57</b> | <b>0.88</b> | <b>0.78</b>          | <b>0.62</b> | <b>0.99</b> | 0.82                  | 0.63 | 1.08 |
|                | 3year           | <b>0.71</b>          | <b>0.56</b> | <b>0.88</b> | <b>0.77</b>          | <b>0.60</b> | <b>0.98</b> | 0.80                  | 0.61 | 1.05 |
|                | 1 year          | <b>0.76</b>          | <b>0.60</b> | <b>0.95</b> | 0.79                 | 0.61        | 1.01        | 0.82                  | 0.62 | 1.08 |
| Liver          | 5 year          | 0.80                 | 0.60        | 1.06        | 0.92                 | 0.68        | 1.25        | 0.82                  | 0.58 | 1.16 |
|                | 3year           | 0.81                 | 0.61        | 1.09        | 0.93                 | 0.68        | 1.27        | 0.83                  | 0.59 | 1.18 |
|                | 1 year          | 0.83                 | 0.61        | 1.12        | 0.92                 | 0.66        | 1.26        | 0.84                  | 0.59 | 1.19 |
| Stomach        | 5 year          | 0.99                 | 0.74        | 1.34        | 1.08                 | 0.78        | 1.50        | 1.12                  | 0.77 | 1.63 |
|                | 3year           | 1.04                 | 0.76        | 1.42        | 1.13                 | 0.81        | 1.59        | 1.19                  | 0.82 | 1.74 |
|                | 1 year          | 1.02                 | 0.74        | 1.40        | 1.09                 | 0.77        | 1.54        | 1.15                  | 0.79 | 1.68 |
| Colorectal     | 5 year          | 0.89                 | 0.62        | 1.27        | 0.93                 | 0.63        | 1.38        | 1.09                  | 0.70 | 1.70 |
|                | 3year           | 0.91                 | 0.63        | 1.32        | 0.96                 | 0.64        | 1.43        | 1.14                  | 0.73 | 1.78 |
|                | 1 year          | 0.83                 | 0.57        | 1.21        | 0.86                 | 0.57        | 1.30        | 1.02                  | 0.65 | 1.60 |
| Pancreas       | 5 year          | 1.12                 | 0.76        | 1.64        | 1.20                 | 0.79        | 1.81        | 1.04                  | 0.65 | 1.66 |
|                | 3year           | 1.13                 | 0.76        | 1.68        | 1.21                 | 0.79        | 1.84        | 1.06                  | 0.67 | 1.70 |
|                | 1 year          | 1.06                 | 0.71        | 1.59        | 1.12                 | 0.72        | 1.72        | 0.98                  | 0.61 | 1.58 |
| Gallbladder    | 5 year          | 0.82                 | 0.51        | 1.30        | 0.78                 | 0.48        | 1.28        | 0.69                  | 0.40 | 1.21 |
|                | 3year           | 0.89                 | 0.55        | 1.43        | 0.84                 | 0.51        | 1.40        | 0.75                  | 0.43 | 1.30 |
|                | 1 year          | 0.97                 | 0.59        | 1.59        | 0.88                 | 0.52        | 1.50        | 0.79                  | 0.45 | 1.40 |
| Female genital | 5 year          | 0.70                 | 0.35        | 1.43        | 0.77                 | 0.38        | 1.56        | 0.64                  | 0.29 | 1.45 |

|                  |        |      |      |      |      |      |      |      |      |      |
|------------------|--------|------|------|------|------|------|------|------|------|------|
|                  | 3year  | 0.73 | 0.35 | 1.51 | 0.79 | 0.38 | 1.64 | 0.69 | 0.30 | 1.56 |
|                  | 1 year | 0.69 | 0.33 | 1.48 | 0.75 | 0.35 | 1.60 | 0.68 | 0.30 | 1.56 |
| Kidney           | 5 year | 1.53 | 0.68 | 3.45 | 1.49 | 0.63 | 3.48 | 1.01 | 0.37 | 2.74 |
|                  | 3year  | 1.72 | 0.75 | 3.91 | 1.62 | 0.69 | 3.84 | 1.20 | 0.44 | 3.26 |
|                  | 1 year | 1.49 | 0.65 | 3.44 | 1.38 | 0.57 | 3.32 | 1.01 | 0.36 | 2.77 |
| Breast           | 5 year | 1.06 | 0.43 | 2.61 | 1.04 | 0.42 | 2.56 | 1.01 | 0.33 | 3.15 |
|                  | 3year  | 0.98 | 0.38 | 2.48 | 0.94 | 0.37 | 2.38 | 0.99 | 0.31 | 3.12 |
|                  | 1 year | 0.77 | 0.30 | 1.97 | 0.73 | 0.28 | 1.87 | 0.75 | 0.24 | 2.35 |
| Prostate         | 5 year | 0.70 | 0.33 | 1.47 | 0.95 | 0.40 | 2.25 | 1.12 | 0.43 | 2.93 |
|                  | 3year  | 0.83 | 0.39 | 1.77 | 1.16 | 0.48 | 2.81 | 1.40 | 0.54 | 3.65 |
|                  | 1 year | 0.91 | 0.42 | 1.99 | 1.37 | 0.55 | 3.40 | 1.64 | 0.63 | 4.31 |
| Non-Hodgkin's    | 5 year | 0.96 | 0.47 | 1.96 | 0.96 | 0.43 | 2.15 | 1.38 | 0.55 | 3.43 |
|                  | 3year  | 0.86 | 0.41 | 1.79 | 0.91 | 0.40 | 2.06 | 1.26 | 0.50 | 3.17 |
|                  | 1 year | 0.72 | 0.34 | 1.53 | 0.68 | 0.29 | 1.59 | 0.86 | 0.33 | 2.22 |
| Esophagus        | 5 year | 0.63 | 0.31 | 1.28 | 0.94 | 0.43 | 2.05 | 1.18 | 0.48 | 2.90 |
|                  | 3year  | 0.72 | 0.35 | 1.50 | 1.09 | 0.49 | 2.44 | 1.38 | 0.56 | 3.39 |
|                  | 1 year | 0.88 | 0.42 | 1.87 | 1.21 | 0.53 | 2.77 | 1.52 | 0.61 | 3.77 |
| Leukemia         | 5 year | 1.61 | 0.68 | 3.77 | 1.80 | 0.70 | 4.61 | 2.39 | 0.80 | 7.18 |
|                  | 3year  | 1.43 | 0.61 | 3.36 | 1.81 | 0.71 | 4.63 | 2.48 | 0.84 | 7.37 |
|                  | 1 year | 1.55 | 0.64 | 3.75 | 2.09 | 0.80 | 5.41 | 2.94 | 0.99 | 8.71 |
| Bladder          | 5 year | 1.59 | 0.61 | 4.14 | 1.56 | 0.53 | 4.60 | 1.02 | 0.27 | 3.89 |
|                  | 3year  | 1.53 | 0.58 | 4.01 | 1.62 | 0.54 | 4.84 | 1.30 | 0.35 | 4.89 |
|                  | 1 year | 1.24 | 0.46 | 3.32 | 1.26 | 0.41 | 3.83 | 1.01 | 0.27 | 3.77 |
| Oral and Pharynx | 5 year | 0.66 | 0.27 | 1.58 | 0.82 | 0.31 | 2.12 | 0.89 | 0.30 | 2.66 |
|                  | 3year  | 0.62 | 0.25 | 1.55 | 0.79 | 0.29 | 2.13 | 0.92 | 0.30 | 2.76 |

|                  |        |             |             |             |             |             |             |      |      |      |
|------------------|--------|-------------|-------------|-------------|-------------|-------------|-------------|------|------|------|
|                  | 1 year | 0.79        | 0.31        | 2.03        | 1.03        | 0.37        | 2.84        | 1.35 | 0.45 | 4.01 |
| Brain            | 5 year | 1.53        | 0.84        | 2.78        | <b>2.00</b> | <b>1.06</b> | <b>3.77</b> | 1.87 | 0.82 | 4.26 |
|                  | 3year  | 1.19        | 0.67        | 2.14        | 1.54        | 0.83        | 2.85        | 1.33 | 0.61 | 2.87 |
|                  | 1 year | 1.21        | 0.64        | 2.28        | 1.58        | 0.81        | 3.09        | 1.34 | 0.60 | 3.00 |
| Multiple myeloma | 5 year | <b>0.66</b> | <b>0.45</b> | <b>0.98</b> | 0.77        | 0.50        | 1.18        | 0.95 | 0.55 | 1.62 |
|                  | 3year  | <b>0.65</b> | <b>0.43</b> | <b>0.97</b> | 0.75        | 0.48        | 1.17        | 0.96 | 0.56 | 1.66 |
|                  | 1 year | <b>0.65</b> | <b>0.42</b> | <b>0.99</b> | 0.78        | 0.49        | 1.24        | 1.03 | 0.59 | 1.78 |

\*Primary model

<sup>1</sup>Model 1: PM + age + sex

<sup>2</sup>Model 2: Model 1 + Health insurance premium + Employment status+ Cigarette smoking status + Cigarette smoking amount (pack per day) + Cigarette smoking period (year) + Alcohol consumption + Physical activity + Nutrition + BMI + Family history of cancer

<sup>3</sup>Model 3: Model 2 + district-level of Elderly population, completeness of high school graduates, Gross Regional Domestic Product, and Population density + Area type + Health screening participation



**Table S6.** Hazard ratios and 95% confidence intervals of cause-specific mortality for an increase of 10 $\mu\text{g}/\text{m}^3$  in individual-level PM<sub>10</sub> concentrations for the previous 5 years after adjusting for individual or areal characteristics in 206,717 National Health Insurance Service-National Sample Cohort subjects in the South Korea.

| Cancer type | Exposure period | Model 1 <sup>1</sup> |             |             | Model 2 <sup>2</sup> |             |             | Model 3 <sup>3*</sup> |             |             |
|-------------|-----------------|----------------------|-------------|-------------|----------------------|-------------|-------------|-----------------------|-------------|-------------|
|             |                 | HRs                  | LL          | UL          | HRs                  | LL          | UL          | HRs                   | LL          | UL          |
| All cancer  | 5 year          | <b>0.90</b>          | <b>0.85</b> | <b>0.96</b> | 0.94                 | 0.88        | 1.01        | 0.93                  | 0.86        | 1.01        |
|             | 3year           | <b>0.92</b>          | <b>0.86</b> | <b>0.98</b> | 0.97                 | 0.90        | 1.03        | 0.97                  | 0.89        | 1.05        |
|             | 1 year          | <b>0.93</b>          | <b>0.88</b> | <b>0.99</b> | 0.97                 | 0.90        | 1.04        | 0.97                  | 0.90        | 1.05        |
| Lung        | 5 year          | <b>0.85</b>          | <b>0.75</b> | <b>0.95</b> | 0.91                 | 0.80        | 1.04        | 0.98                  | 0.84        | 1.14        |
|             | 3year           | <b>0.86</b>          | <b>0.76</b> | <b>0.97</b> | 0.92                 | 0.81        | 1.05        | 0.98                  | 0.84        | 1.15        |
|             | 1 year          | 0.89                 | 0.78        | 1.01        | 0.94                 | 0.82        | 1.07        | 1.00                  | 0.86        | 1.16        |
| Liver       | 5 year          | <b>0.73</b>          | <b>0.63</b> | <b>0.85</b> | <b>0.77</b>          | <b>0.65</b> | <b>0.90</b> | <b>0.76</b>           | <b>0.63</b> | <b>0.93</b> |
|             | 3year           | <b>0.73</b>          | <b>0.62</b> | <b>0.85</b> | <b>0.76</b>          | <b>0.64</b> | <b>0.91</b> | <b>0.78</b>           | <b>0.63</b> | <b>0.95</b> |
|             | 1 year          | <b>0.75</b>          | <b>0.63</b> | <b>0.89</b> | <b>0.77</b>          | <b>0.65</b> | <b>0.92</b> | <b>0.81</b>           | <b>0.66</b> | <b>0.98</b> |
| Stomach     | 5 year          | 0.97                 | 0.82        | 1.13        | 1.04                 | 0.87        | 1.23        | 1.02                  | 0.83        | 1.16        |
|             | 3year           | 0.98                 | 0.83        | 1.16        | 1.06                 | 0.89        | 1.28        | 1.06                  | 0.89        | 1.31        |
|             | 1 year          | 0.97                 | 0.82        | 1.15        | 1.04                 | 0.87        | 1.25        | 1.04                  | 0.87        | 1.28        |
| Colorectal  | 5 year          | 0.91                 | 0.75        | 1.10        | 0.90                 | 0.73        | 1.11        | 0.87                  | 0.67        | 1.11        |
|             | 3year           | 0.93                 | 0.76        | 1.14        | 0.94                 | 0.76        | 1.17        | 0.93                  | 0.72        | 1.19        |
|             | 1 year          | 0.89                 | 0.73        | 1.10        | 0.90                 | 0.72        | 1.12        | 0.90                  | 0.70        | 1.15        |
| Pancreas    | 5 year          | 1.00                 | 0.82        | 1.23        | 1.04                 | 0.84        | 1.29        | 0.94                  | 0.73        | 1.22        |
|             | 3year           | 1.01                 | 0.81        | 1.25        | 1.04                 | 0.83        | 1.31        | 0.95                  | 0.74        | 1.23        |
|             | 1 year          | 0.99                 | 0.80        | 1.23        | 1.02                 | 0.81        | 1.28        | 0.93                  | 0.72        | 1.20        |
| Gallbladder | 5 year          | 0.85                 | 0.66        | 1.08        | 0.82                 | 0.63        | 1.07        | 0.80                  | 0.58        | 1.09        |
|             | 3year           | 0.89                 | 0.69        | 1.16        | 0.86                 | 0.65        | 1.14        | 0.86                  | 0.62        | 1.18        |
|             | 1 year          | 0.96                 | 0.74        | 1.25        | 0.91                 | 0.69        | 1.21        | 0.93                  | 0.68        | 1.27        |

|                  |        |             |             |             |             |             |             |             |             |             |
|------------------|--------|-------------|-------------|-------------|-------------|-------------|-------------|-------------|-------------|-------------|
| Female genital   | 5 year | 1.12        | 0.77        | 1.64        | 1.16        | 0.80        | 1.69        | 1.04        | 0.66        | 1.62        |
|                  | 3year  | 1.18        | 0.79        | 1.74        | 1.19        | 0.80        | 1.76        | 1.06        | 0.67        | 1.67        |
|                  | 1 year | 1.14        | 0.76        | 1.70        | 1.15        | 0.77        | 1.71        | 1.05        | 0.67        | 1.65        |
| Kidney           | 5 year | 1.44        | 0.94        | 2.20        | 1.42        | 0.91        | 2.21        | 1.09        | 0.65        | 1.84        |
|                  | 3year  | <b>1.58</b> | <b>1.02</b> | <b>2.45</b> | 1.54        | 0.98        | 2.42        | 1.23        | 0.73        | 2.07        |
|                  | 1 year | <b>1.68</b> | <b>1.08</b> | <b>2.61</b> | <b>1.61</b> | <b>1.02</b> | <b>2.55</b> | 1.32        | 0.78        | 2.21        |
| Breast           | 5 year | 1.07        | 0.67        | 1.72        | 1.06        | 0.66        | 1.71        | 1.33        | 0.75        | 2.36        |
|                  | 3year  | 1.09        | 0.67        | 1.78        | 1.07        | 0.66        | 1.76        | 0.80        | 0.45        | 1.43        |
|                  | 1 year | 0.98        | 0.60        | 1.60        | 0.96        | 0.58        | 1.57        | 0.73        | 0.41        | 1.29        |
| Prostate         | 5 year | 0.78        | 0.53        | 1.17        | 0.81        | 0.50        | 1.30        | 0.86        | 0.49        | 1.50        |
|                  | 3year  | 0.86        | 0.57        | 1.30        | 0.91        | 0.56        | 1.48        | 1.01        | 0.57        | 1.76        |
|                  | 1 year | 0.90        | 0.59        | 1.37        | 0.99        | 0.60        | 1.64        | 1.12        | 0.64        | 1.96        |
| Non-Hodgkin's    | 5 year | 0.92        | 0.63        | 1.35        | 0.97        | 0.64        | 1.48        | 1.03        | 0.63        | 1.70        |
|                  | 3year  | 0.90        | 0.60        | 1.34        | 0.97        | 0.62        | 1.51        | 1.03        | 0.62        | 1.71        |
|                  | 1 year | 0.88        | 0.59        | 1.32        | 0.90        | 0.58        | 1.42        | 0.93        | 0.56        | 1.54        |
| Esophagus        | 5 year | 0.88        | 0.60        | 1.27        | 1.04        | 0.69        | 1.57        | 1.22        | 0.72        | 2.06        |
|                  | 3year  | 0.96        | 0.65        | 1.42        | 1.14        | 0.74        | 1.74        | 1.36        | 0.81        | 2.30        |
|                  | 1 year | 1.12        | 0.75        | 1.66        | 1.21        | 0.78        | 1.86        | <b>1.99</b> | <b>1.19</b> | <b>3.31</b> |
| Leukemia         | 5 year | 1.19        | 0.76        | 1.86        | 1.15        | 0.70        | 1.90        | 1.08        | 0.60        | 1.95        |
|                  | 3year  | 1.15        | 0.72        | 1.84        | 1.19        | 0.71        | 2.00        | 1.14        | 0.63        | 2.08        |
|                  | 1 year | 1.20        | 0.75        | 1.91        | 1.29        | 0.77        | 2.17        | 1.26        | 0.70        | 2.27        |
| Bladder          | 5 year | 1.12        | 0.68        | 1.85        | 1.02        | 0.58        | 1.81        | 0.71        | 0.35        | 1.48        |
|                  | 3year  | 1.11        | 0.66        | 1.88        | 1.06        | 0.59        | 1.91        | 0.82        | 0.39        | 1.72        |
|                  | 1 year | 0.99        | 0.58        | 1.70        | 0.91        | 0.49        | 1.69        | 0.70        | 0.33        | 1.48        |
| Oral and Pharynx | 5 year | 0.98        | 0.61        | 1.56        | 1.14        | 0.69        | 1.90        | 1.00        | 0.55        | 1.80        |

|                  |        |             |             |             |             |             |             |             |             |             |
|------------------|--------|-------------|-------------|-------------|-------------|-------------|-------------|-------------|-------------|-------------|
|                  | 3year  | 0.96        | 0.59        | 1.57        | 1.13        | 0.66        | 1.91        | 1.00        | 0.55        | 1.80        |
|                  | 1 year | 1.07        | 0.65        | 1.74        | 1.25        | 0.73        | 2.12        | 1.16        | 0.66        | 2.06        |
| Brain            | 5 year | 1.12        | 0.83        | 1.52        | 1.26        | 0.91        | 1.75        | 0.95        | 0.62        | 1.44        |
|                  | 3year  | 1.00        | 0.72        | 1.39        | 1.14        | 0.80        | 1.62        | 0.82        | 0.53        | 1.26        |
|                  | 1 year | 1.00        | 0.72        | 1.37        | 1.12        | 0.80        | 1.58        | 0.84        | 0.55        | 1.26        |
| Multiple myeloma | 5 year | <b>1.42</b> | <b>1.15</b> | <b>1.75</b> | <b>1.51</b> | <b>1.20</b> | <b>1.89</b> | <b>1.65</b> | <b>1.22</b> | <b>2.24</b> |
|                  | 3year  | <b>1.53</b> | <b>1.23</b> | <b>1.90</b> | <b>1.65</b> | <b>1.30</b> | <b>2.10</b> | <b>1.80</b> | <b>1.33</b> | <b>2.44</b> |
|                  | 1 year | <b>1.58</b> | <b>1.27</b> | <b>1.95</b> | <b>1.72</b> | <b>1.36</b> | <b>2.18</b> | <b>1.84</b> | <b>1.38</b> | <b>2.45</b> |

\*Primary model

<sup>1</sup>Model 1: PM + age + sex

<sup>2</sup>Model 2: Model 1 + Health insurance premium + Employment status+ Cigarette smoking status + Cigarette smoking amount (pack per day) + Cigarette smoking period (year) + Alcohol consumption + Physical activity + Nutrition + BMI + Family history of cancer

<sup>3</sup>Model 3: Model 2 + district-level of Elderly population, completeness of high school graduates, Gross Regional Domestic Product, and Population density + Area type + Health screening participation

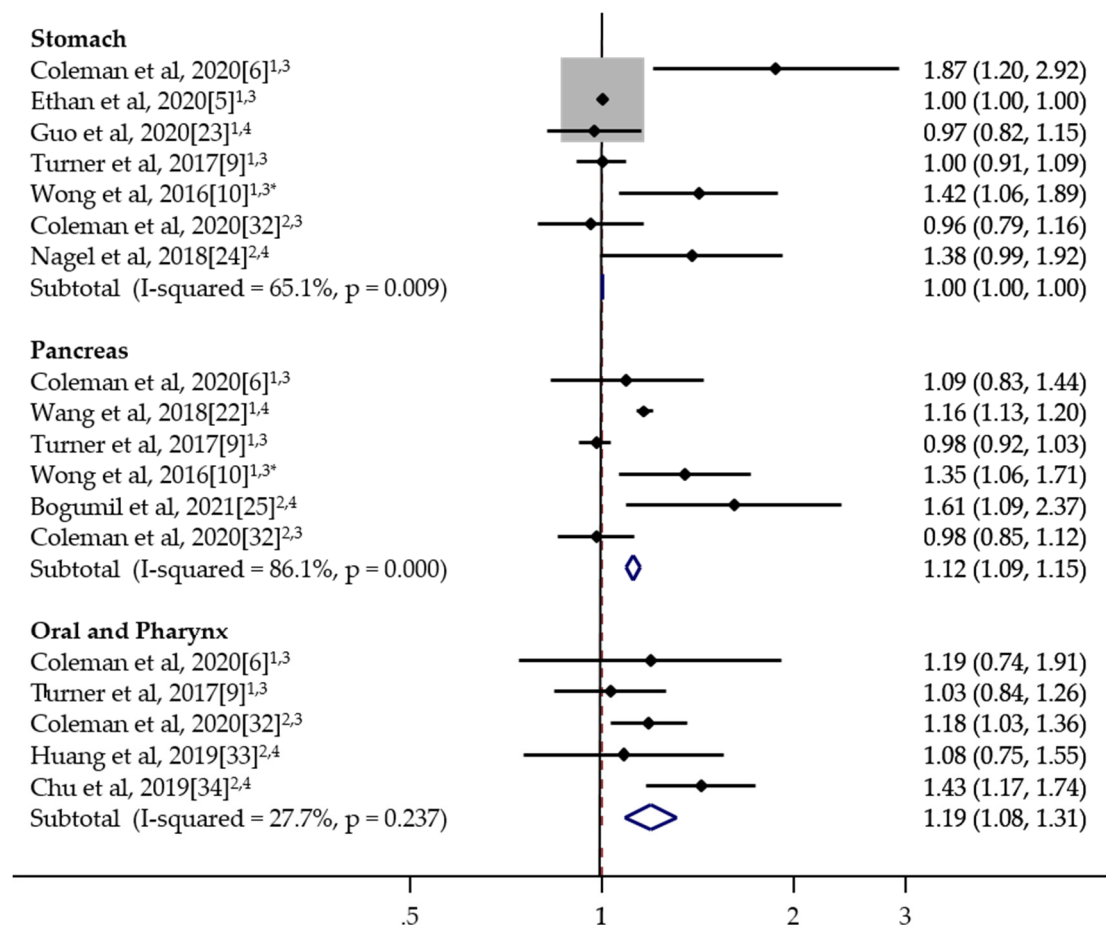

<sup>1</sup>Mortality study

<sup>2</sup>Incidence study

<sup>3</sup>Study for comparison across cancers

<sup>4</sup>Study for individual cancer

\*Wong et al, 2016 stomach cancer includes esophageal cancer as upper digestive tract; pancreas cancer includes liver cancer as accessory organs.

**Figure S4.** Hazard ratios and 95% confidence intervals of mortality or incidence of stomach, pancreas, and oral and pharynx cancer for long-term exposure to PM<sub>2.5</sub>.

Table S7. Hazard ratios and 95% confidence intervals of lung, pancreas, non-Hodgkin's, esophagus, and oral and pharynx cancer mortality for a 10 $\mu$ g/m<sup>3</sup> increase in individual-level PM<sub>2.5</sub> concentrations for the previous 5 years in the primary model (model 2) by definition of cancer deaths based on both single and multiple cancer sites versus single sites only in 87,608 National Health Insurance Service-National Sample Cohort subjects in the Seoul Metropolitan Area.

| Definition of cancer death       |                 |      |      |      |        |                         |       |      |        |
|----------------------------------|-----------------|------|------|------|--------|-------------------------|-------|------|--------|
| Single and multiple cancer sites |                 |      |      |      |        | Single cancer site only |       |      |        |
| Cancer type                      | Exposure period | Case | HRs  | LL   | UL     | Case                    | HRs   | LL   | UL     |
| Lung                             | 5 year          | 367  | 1.55 | 0.73 | 3.26   | 273                     | 3.03  | 0.85 | 10.78  |
|                                  | 3year           |      | 1.62 | 0.79 | 3.31   |                         | 2.13  | 0.91 | 5.03   |
|                                  | 1 year          |      | 1.68 | 0.84 | 3.35   |                         | 2.34  | 1.03 | 5.31   |
| Pancreas                         | 5 year          | 129  | 3.47 | 1.05 | 11.51  | 95                      | 5.77  | 1.47 | 22.71  |
|                                  | 3year           |      | 3.60 | 1.16 | 11.23  |                         | 5.53  | 1.53 | 20.00  |
|                                  | 1 year          |      | 2.47 | 0.81 | 7.59   |                         | 3.03  | 0.85 | 10.78  |
| Non-Hodgkin's                    | 5 year          | 35   | 1.44 | 0.12 | 17.83  | 31                      | 1.62  | 0.12 | 22.02  |
|                                  | 3year           |      | 0.79 | 0.07 | 9.17   |                         | 0.94  | 0.08 | 11.68  |
|                                  | 1 year          |      | 0.57 | 0.06 | 5.76   |                         | 0.67  | 0.06 | 7.09   |
| Esophagus                        | 5 year          | 35   | 2.43 | 0.21 | 27.82  | 33                      | 2.71  | 0.21 | 35.45  |
|                                  | 3year           |      | 2.87 | 0.27 | 30.72  |                         | 2.95  | 0.25 | 35.17  |
|                                  | 1 year          |      | 3.02 | 0.34 | 27.29  |                         | 3.27  | 0.34 | 31.56  |
| Oral and Pharynx                 | 5 year          | 25   | 7.14 | 0.40 | 126.86 | 18                      | 28.39 | 0.90 | 894.43 |
|                                  | 3year           |      | 5.31 | 0.36 | 78.93  |                         | 12.50 | 0.52 | 299.72 |
|                                  | 1 year          |      | 8.14 | 0.80 | 83.10  |                         | 9.99  | 0.61 | 162.99 |

Table S8. HRs and 95%CI of lung, pancreas, non-Hodgkin's, esophagus, and oral and pharynx cancer mortality for a 10 $\mu$ g/m<sup>3</sup> increase in individual-level PM2.5 concentrations for the previous 5, 3, and 1 years in primary model (model 2) for the comparison between including and excluding lung cancer patients before 2006 using National Health Insurance Service-National Sample Cohort subjects in the Seoul Metropolitan Area.

| Cancer type      | Exposure period | Including cancer patients |      |      |        | Excluding cancer patents |      |      |         |
|------------------|-----------------|---------------------------|------|------|--------|--------------------------|------|------|---------|
|                  |                 | Case                      | HRs  | LL   | UL     | Case                     | HRs  | LL   | UL      |
| Lung             | 5 year          | 367                       | 1.55 | 0.73 | 3.26   | 53                       | 1.60 | 0.24 | 10.76   |
|                  | 3year           |                           | 1.62 | 0.79 | 3.31   |                          | 3.27 | 0.56 | 19.06   |
|                  | 1 year          |                           | 1.68 | 0.84 | 3.35   |                          | 2.81 | 0.50 | 15.82   |
| Pancreas         | 5 year          | 129                       | 3.47 | 1.05 | 11.51  | 46                       | 2.49 | 0.30 | 20.74   |
|                  | 3year           |                           | 3.60 | 1.16 | 11.23  |                          | 4.26 | 0.60 | 30.16   |
|                  | 1 year          |                           | 2.47 | 0.81 | 7.59   |                          | 3.64 | 0.60 | 22.03   |
| Non-Hodgkin's    | 5 year          | 35                        | 1.44 | 0.12 | 17.83  | 17                       | 0.62 | 0.02 | 22.97   |
|                  | 3year           |                           | 0.79 | 0.07 | 9.17   |                          | 0.33 | 0.01 | 11.50   |
|                  | 1 year          |                           | 0.57 | 0.06 | 5.76   |                          | 0.29 | 0.01 | 9.01    |
| Esophagus        | 5 year          | 35                        | 2.43 | 0.21 | 27.82  | 5                        | 1.74 | 0.00 | 1958.95 |
|                  | 3year           |                           | 2.87 | 0.27 | 30.72  |                          | 0.91 | 0.00 | 1722.42 |
|                  | 1 year          |                           | 3.02 | 0.34 | 27.29  |                          | 0.42 | 0.00 | 267.05  |
| Oral and Pharynx | 5 year          | 25                        | 7.14 | 0.40 | 126.86 | 7                        | 0.44 | 0.00 | 208.71  |
|                  | 3year           |                           | 5.31 | 0.36 | 78.93  |                          | 0.15 | 0.00 | 51.70   |
|                  | 1 year          |                           | 8.14 | 0.80 | 83.10  |                          | 0.17 | 0.00 | 42.33   |
